# Supplementary material for: Coproduction of lipids and extracellular polysaccharides from the novel green alga Parachlorella sp. BX1.5 depending on cultivation conditions
Source: PubMed Central journal article supplement — Biotechnol Rep (Amst). 2019 Nov 21;25:e00392. doi: 10.1016/j.btre.2019.e00392 (PMC6909058; doi:10.1016/j.btre.2019.e00392), 2019-11-21
Supplement: mmc1.pdf [file mmc1.pdf]

**Table S1.** Lipid composition in the BX1.5 cells.

| FAMES | BG11            | -N              | -P              | -N-P            |
|-------|-----------------|-----------------|-----------------|-----------------|
|       | 6 days          | 6 days          | 6 days          | 6 days          |
| C16:0 | 21.9 $\pm$ 0.02 | 22.7 $\pm$ 0.11 | 23.8 $\pm$ 0.05 | 20.3 $\pm$ 0.38 |
| C16:1 | 1.0 $\pm$ 0.05  | 0.8 $\pm$ 0.15  | 0.7 $\pm$ 0.02  | 0.6 $\pm$ 0.01  |
| C16:2 | 2.5 $\pm$ 0.15  | 1.0 $\pm$ 0.01  | 1.1 $\pm$ 0.05  | 1.1 $\pm$ 0.02  |
| C16:3 | 0.8 $\pm$ 0.04  | 0.9 $\pm$ 0.02  | 1.1 $\pm$ 0.02  | 0.9 $\pm$ 0.05  |
| C18:0 | 5.5 $\pm$ 0.23  | 7.8 $\pm$ 0.08  | 7.1 $\pm$ 0.06  | 6.5 $\pm$ 0.19  |
| C18:1 | 13.0 $\pm$ 0.52 | 17.9 $\pm$ 0.18 | 19.5 $\pm$ 0.08 | 18.3 $\pm$ 1.89 |
| C18:2 | 45.2 $\pm$ 0.33 | 32.1 $\pm$ 0.05 | 39.0 $\pm$ 0.09 | 43.6 $\pm$ 1.26 |
| C18:3 | 10.0 $\pm$ 0.23 | 16.9 $\pm$ 0.14 | 7.7 $\pm$ 0.14  | 8.8 $\pm$ 0.10  |

Lipid composition as FAMES in the BX1.5 cells cultivated in the BG11, BG11-N, BG11-P, and BG11-N-P medium shown in Figure 7 was evaluated and displayed as percentage values with standard deviations.

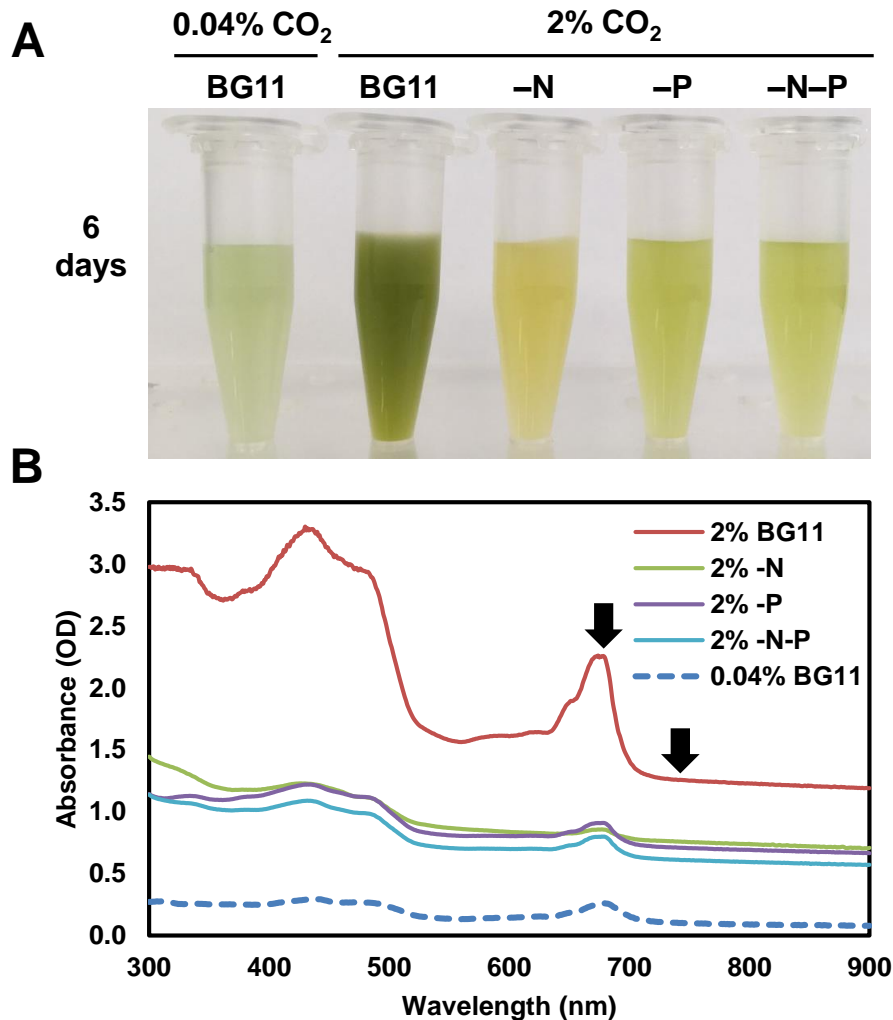

**Fig. S1.** Culture profile and absorption spectrum. (A) Cells were harvested on the 6<sup>th</sup> day under induction cultivation conditions, as shown in Fig. 2A. (B) This sample was directly subjected to analysis by absorption spectrophotometry. The main peak at OD<sub>674</sub> for chl *a* and OD<sub>730</sub> for cell turbidity measurement (Fig. 2B) are shown with arrows.

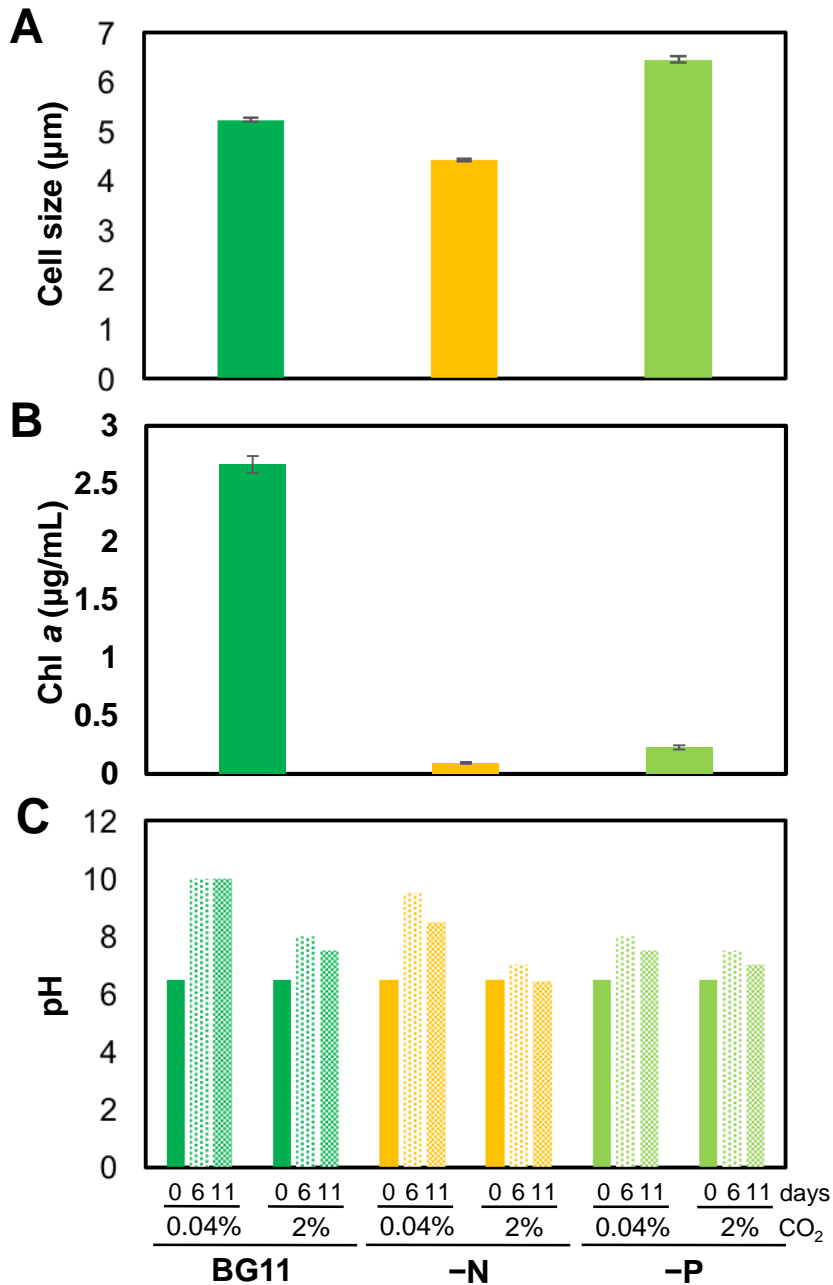

**Fig. S2.** Cell size, chlorophyll *a*, and pH of BX1.5. **(A)** Diameters of the cells cultivated under the supply of 2% CO<sub>2</sub>-air shown in Fig. S1 and S3, and that with standard deviations from the photography profiles are shown in Fig. 4. Sample numbers: BG11,  $n = 28$ ; BG11–N,  $n = 13$ , and BG11–P,  $n = 19$ , respectively. **(B)** The amount of chlorophyll *a* from the cell culture in panel A was measured by the methanol-extraction method [17]. **(C)** pH of the cell culture shown in Fig. 2 was sequentially measured for 0, 6, and 11 days under the induction cultivation condition supplying with 2% CO<sub>2</sub>-air or under the standard condition of 0.04% CO<sub>2</sub>-air.

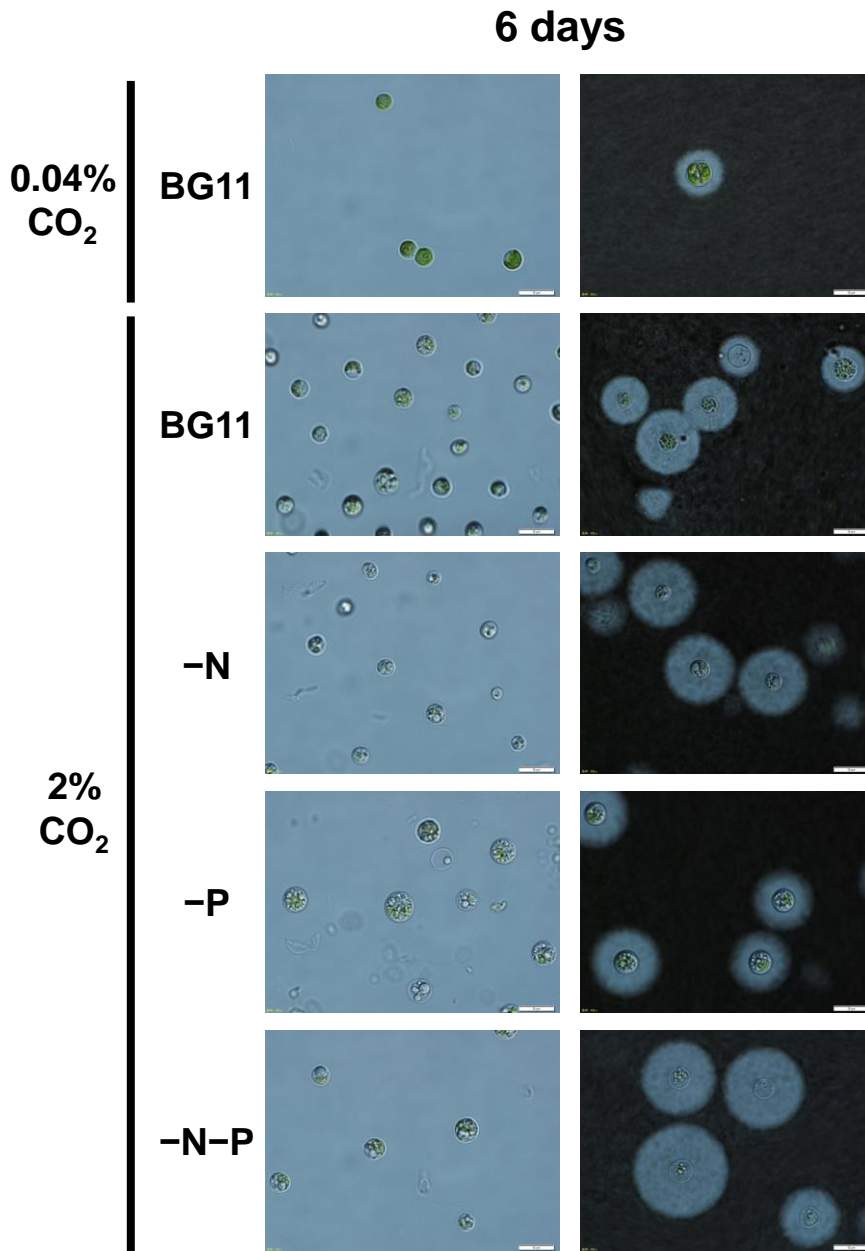

**Fig. S3.** Cells were harvested on the 6<sup>th</sup> day under induction cultivation condition as shown in Fig. 2A or Fig. S1. The samples were subjected to microscopic observations without (**left**) or with (**right**) India-ink stain. More details are described in the text.

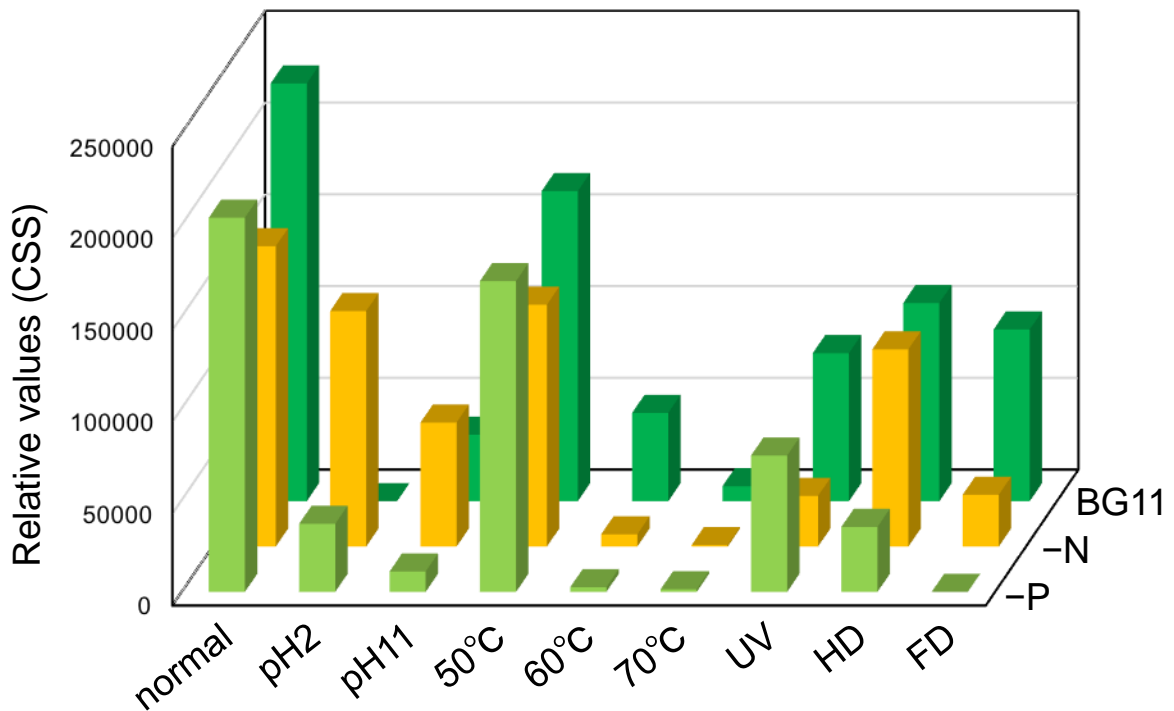

**Fig. S4.** Cell resistance to respective stresses. Relative cell-spot signal intensities (CSS) for the cell resistance on the BG11 plate, shown in Fig. 8B, were evaluated by a densitometry image analyzer (Bio1D Optical Density: Vilber Lourmat, Wielandstrasse, Germany) and presented as a profile with relative values. More details are described in the text.
